# Supplementary material for: Land suitability assessment for wheat-barley cultivation in a semi-arid region of Eastern Anatolia in Turkey
Source: PeerJ journal article supplement (doi:10.7717/peerj.16396), 2023-10-31
Supplement: datalar.zip [file datalar.zip]

## Sheet: Sayfa1
No	latitude	longitude	pH	EC (dSm-1)	% O. Matter	% CaCo3	% Clay	%silt	% sand	BD( gr/ cm3)	Depth(cm)	Slope %	H.C(K) cm h-1	AWC	% N	P (mg kg-1)	Exc Nacmolkg-1	EXC. Ca cmolkg-1	EXC. Mg cmolkg-1	EXC. K cmolkg-1	CEC ( cmolkg-1)	ESP	Cu (mg kg-1)	Zn (mg kg-1)	Fe (mg kg-1)	Mn(mg kg-1)
1	348645	4286918	7.3	0.343	2.953	2.517	28.955	26.285	44.76	0.948	20	20	0.287179	14.52	0.228	10.69	0.843865	10.4803	0.791275	0.298559	12.414	6.79769	1.778	5.212	47.83	172.539
2	349036	4286910	7.83	0.149	0.949	2.388	23.67	34.99	41.33	1.227	20	30	0.27451	12.4	0.088	7.328	0.899109	9.0161	1.46817	1.08682	12.4702	7.21006	0.728	0.453	11.872	24.77
3	349427	4286903	7.543	0.111	1.401	2.195	23.942	32.87	43.188	1.58	20	20	0.21	8.56	0.088	4.664	0.849761	7.5994	1.74303	1.08229	11.2745	7.53703	1.704	1.573	36.733	67.54
4	349818	4286895	7.09	0.208	1.402	2.324	29.991	28.347	41.662	1.241	20	20	0.285	13.38	0.095	4.664	0.974935	10.0245	1.22938	0.755726	12.9846	7.50842	1.71	2.83	77.828	85.371
5	350209	4286888	7.477	0.252	1.457	2.195	25.787	23.126	51.087	1.49	90	6	1.85	12.03	0.088	6.78	0.752333	7.66038	1.11257	0.969223	10.4945	7.16882	1.076	1.797	24.336	58.18
6	350600	4286881	8.387	0.198	2.008	10.679	27.436	23.666	48.898	1.59	90	6	0.65	13.61	0.214	4.813	0.936472	21.0559	1.82428	1.29623	25.1129	3.72906	1.206	0.661	9.043	47.104
7	350991	4286873	8.343	0.185	2.249	3.485	30.545	21.549	47.906	1.48	90	6	0.72087	12.34	0.228	6.73	1.04018	20.8843	1.86731	1.06617	24.858	4.18449	1.212	0.468	11.84	49.423
8	350983	4286474	8.703	0.119	0.81	6.325	27.21	21.43	51.36	1.38	90	6	1.03	12.81	0.074	5.187	0.966624	23.7438	0.604117	0.376385	25.6909	3.76251	0.825	0.235	5.132	20.532
9	350593	4286481	8.45	0.127	1.114	13.645	33.368	19.275	47.357	1.327	90	6	0.67	12.1	0.088	6.282	1.03164	28.6106	1.18883	0.560785	31.3919	3.28631	0.762	0.235	4.482	17.745
10	350202	4286489	7.747	0.197	1.129	3.615	33.921	20.026	46.053	1.45	90	6	0.64	10.37	0.081	4.639	0.63992	11.4561	0.870696	1.10722	14.0739	4.54684	0.647	0.957	12.693	40.147
11	349811	4286496	7.513	0.121	1.616	2.065	34.206	15.042	50.752	1.46	20	20	0.87	12.86	0.102	6.905	0.733591	12.0705	1.36826	1.01833	15.1907	4.82922	1.29	1.241	29.895	70.556
12	349420	4286503	7.417	0.128	1.917	4.26	32.17	24.334	43.496	1.256	20	30	0.31	13.4	0.144	10.939	0.850676	13.3011	1.57428	0.895354	16.6214	5.11795	1.937	1.932	35.776	85.142
13	349029	4286511	7.547	0.267	2.541	4.454	23.144	30.108	46.748	1.51	20	30	0.374	7.6	0.116	5.51	0.854537	15.7567	1.55353	1.39419	19.5589	4.36904	1.876	0.784	21.455	96.993
14	348638	4286518	8.167	0.173	2.621	2.106	35.474	20.33	44.196	1.335	20	20	0.273016	12.96	0.242	6.232	1.1352	25.8638	1.24591	1.28054	29.5254	3.84483	1.97	0.509	16.858	74.81
15	348630	4286119	8.34	0.165	2.474	3.546	23.942	32.87	43.188	1.59	20	20	0.79	8.56	0.242	6.108	1.09337	23.8795	1.34751	1.0221	27.3425	3.99881	1.672	0.549	14.945	52.694
16	349021	4286111	7.763	0.328	2.879	1.94	26.177	28.238	45.586	1.551	20	20	0.273	10.71	0.347	6.332	1.22226	12.8622	1.55487	0.987746	16.627	7.35104	1.605	0.858	22.823	78.278
17	349412	4286104	8.45	0.201	2.323	11.632	39.36	27.06	33.58	1.274	20	20	0.0904301	13.95	0.207	5.685	0.962433	24.2979	0.729513	1.13124	27.1211	3.54866	0.512	0.292	6.256	20.127
18	349803	4286096	8.473	0.165	2.123	11.716	32.21	22.07	45.72	1.417	20	20	0.317708	13.85	0.291	5.784	0.80776	24.9588	0.80595	0.816746	27.3893	2.94919	0.574	0.248	5.902	21.557
19	350194	4286089	7.617	0.132	1.567	1.547	34.002	18.732	47.267	1.552	20	6	0.948	11.14	0.137	5.685	0.784898	11.6334	1.32322	0.716641	14.4581	5.42876	0.823	0.409	17.618	35.888
20	350585	4286082	7.56	0.118	1.779	1.934	33.068	22.862	44.071	1.643	90	6	0.413	10.74	0.13	6.382	0.730326	21.1392	1.59959	0.708982	24.1781	3.02061	0.847	0.442	17.774	41.4
21	350976	4286074	7.603	0.12	2.063	1.547	31.295	23.059	45.645	1.554	90	2	0.381818	11.78	0.159	9.544	0.641626	7.17124	1.11048	1.05859	9.98194	6.42787	0.665	0.908	12.251	46.662
22	350969	4285675	8.447	0.135	1.848	20.117	29.622	25.45	44.928	1.354	20	2	0.57	12.72	0.17	5.834	1.05069	30.9711	1.62787	0.910854	34.5606	3.04014	0.48	0.229	5.621	13.289
23	350578	4285682	8.183	0.139	2.489	3.5	31.295	23.059	45.645	1.581	90	2	0.421261	9.91	0.155	6.083	1.3775	14.4495	0.848571	1.24501	17.9205	7.68673	1.073	0.659	12.626	38.649
24	350187	4285690	8.207	0.275	3.061	4.148	34.499	27.269	38.232	1.393	20	2	0.53	13.26	0.206	5.909	1.00843	17.852	1.06776	0.950174	20.8784	4.83	1.045	0.394	10.338	40.781
25	349796	4285697	8.22	0.203	2.815	5.314	22.11	23.92	53.97	1.518	20	12	1.94	12.03	0.169	5.187	1.4456	19.4057	1.13743	0.775364	22.7641	6.35034	0.56	1.256	10.785	19.57
26	349405	4285704	8.283	0.179	3.84	2.458	33.458	41.719	24.823	1.418	50	20	0.0386667	14.19	0.408	4.639	1.40223	14.3661	1.11131	0.814277	17.694	7.92493	0.754	0.449	12.667	34.349
27	349014	4285712	8.297	0.145	3.055	2.328	32.06	26.5	41.44	1.181	20	30	0.194	13.32	0.309	4.788	1.14805	16.6039	0.753371	0.79681	19.3021	5.9478	0.469	1.113	8.809	17.709
28	348623	4285719	8.11	0.11	2.212	1.94	23.364	34.838	41.797	1.475	20	30	0.204938	11.19	0.201	7.303	1.2446	22.0066	1.65083	1.38689	26.2889	4.73433	0.935	0.602	12.386	31.421
29	348232	4285727	7.107	0.151	2.941	1.746	33.11	24.5	42	1.181	20	30	0.346354	12.22	0.231	5.137	0.617024	11.3791	1.08684	0.462662	13.5456	4.55516	1.278	1.363	55.931	51.119
30	347841	4285734	7.283	0.151	2.574	2.07	29.265	31.326	39.409	1.433	20	20	0.39899	11.99	0.184	6.93	0.772517	20.6866	1.90259	1.06041	24.4221	3.16318	1.66	0.92	26.26	96.577
31	347833	4285335	7.54	0.101	1.43	1.555	30.147	28.096	41.757	1.653	20	20	0.699115	11.36	0.09	5.535	0.677367	7.93355	1.23778	0.804046	10.6527	6.35862	0.909	0.799	17.42	58.279
32	348224	4285327	7.423	0.134	1.314	3.111	37.426	23.031	39.543	1.334	20	20	0.146	13.69	0.098	6.033	0.678402	13.1793	1.56444	0.942731	16.3649	4.14547	0.574	0.256	6.698	20.236
33	348615	4285320	7.167	0.206	1.951	3.111	34.998	22.789	42.213	1.397	20	20	0.08	13	0.089	6.531	0.705696	8.34927	0.976508	0.569382	10.6009	6.65697	0.448	0.536	18.46	49.985
34	349006	4285312	7.237	0.095	2.199	2.188	32.103	23.924	43.974	1.518	50	20	0.167	12.03	0.203	8.797	0.793737	19.2292	1.12915	0.524979	21.6771	3.66164	0.458	0.546	16.427	51.119
35	349397	4285305	7.553	0.103	1.902	1.555	36.683	40.018	23.299	1.12	50	20	0.15	15.4	0.186	8.747	0.569435	7.60209	0.744254	0.711787	9.62757	5.91463	0.957	2.133	21.195	48.004
36	349788	4285297	8.337	0.213	1.324	3.889	27.341	28.377	44.283	1.529	50	20	7.65	11.13	0.159	8.548	0.865933	18.8295	3.08965	0.688659	23.4737	3.68895	0.763	0.266	11.804	40.251
37	350179	4285290	8.35	0.137	2.151	8.749	25.088	27.144	47.768	1.441	20	2	0.34	11.11	0.191	2.174	0.899348	17.4037	0.583004	0.644395	19.5305	4.60485	0.815	0.299	7.66	33.355
38	350570	4285283	7.303	0.097	0.765	1.685	23.71	19.657	56.633	1.406	90	2	1.68	10.31	0.105	5.51	0.61013	7.68729	1.96778	0.455795	10.721	5.69099	0.728	0.616	13.338	15.53
39	350961	4285275	8.403	0.094	2.588	6.222	27.278	25.212	47.51	1.436	90	2	0.213	11.94	0.225	4.041	1.39845	13.4776	0.776983	0.50609	16.1591	8.65426	0.043	0.233	4.753	13.143
40	351352	4285268	8.643	0.086	1.182	9.527	22.915	24.961	52.124	1.517	20	6	1.13757	10.1	0.086	4.788	0.975885	17.6861	0.387183	0.291895	19.3411	5.04566	0.19	0.498	3.999	12.67
41	351736	4284861	8.453	0.151	1.255	18.571	21.136	25.28	53.585	1.428	90	2	1.09	10.14	0.097	3.718	0.720991	21.5776	3.28229	0.617785	26.1987	2.75201	1.124	0.917	17.098	80.031
42	351345	4284869	8.663	0.119	0.772	1.595	22.89	20.846	56.264	1.583	90	2	1.54	9.43	0.071	4.564	0.919575	27.0096	0.565471	0.477379	28.972	3.17401	0.571	0.247	3.734	15.395
43	350954	4284876	7.653	0.101	1.663	5.999	27.043	27.043	45.913	1.63	90	2	0.657658	9.99	0.104	4.614	1.30825	16.8959	1.39124	0.899869	20.4952	6.38322	1.031	0.381	7.847	35.477
44	350563	4284883	8.423	0.104	2.621	7.084	27.067	21.941	50.992	1.155	90	2	0.73	12.94	0.177	6.208	1.03745	27.1018	0.583821	0.999292	29.7223	3.49048	0.892	0.255	4.285	12.956
45	350172	4284891	8.65	0.115	2.927	8.424	17.036	17.036	65.928	1.529	50	2	6.56	8.03	0.176	4.091	1.06942	22.9233	2.36086	0.723308	27.0769	3.94958	0.604	0.334	7.842	23.377
46	349781	4284898	8.127	0.117	1.838	1.723	19.401	10.966	69.633	1.439	50	2	2.14	8.67	0.195	6.133	1.40137	27.4149	2.08293	1.15837	32.0576	4.37142	1.606	1.189	28.527	62.481
47	349389	4284905	8.36	0.14	0.754	20.421	23.251	21.175	55.575	1.48	50	2	1.23	11.86	0.076	5.809	0.810737	28.7777	0.899808	1.15933	31.6476	2.56177	1.139	0.313	8.861	24.141
48	348998	4284913	8.333	0.106	2.181	2.872	21.269	23.355	55.376	1.358	50	2	0.392929	10.66	0.198	4.963	0.918032	20.6984	2.08961	1.08223	24.7882	3.7035	0.914	0.709	10.228	30.308
49	348607	4284920	8	0.137	2.207	9.955	34.183	33.128	32.689	1.32	20	20	0.569662	12.21	0.173	4.689	0.798018	22.7411	4.53588	0.586156	28.6612	2.78432	1.09	0.28	22.979	28.116
50	348216	4284928	8.31	0.148	1.713	13.976	31.448	25.241	43.31	1.427	20	20	0.420765	11.81	0.122	7.652	0.969302	24.1268	1.35349	0.889856	27.3394	3.54544	0.436	0.237	3.26	18.543
51	347825	4284935	8.427	0.137	2.041	13.976	35.886	29.627	34.487	1.456	20	20	0.174656	12.93	0.128	5.759	1.96978	25.8594	1.50457	1.46643	30.8002	6.39536	0.676	0.628	6.1	31.091
52	347818	4284536	8.327	0.124	0.717	10.211	29.219	27.161	43.621	1.43	20	6	0.086	11.8	0.054	6.481	0.73027	22.7661	0.651029	0.859703	25.0071	2.92025	0.75	0.382	5.777	23.66
53	348209	4284528	8.207	0.12	1.253	10.657	35.341	33.286	31.373	1.47	20	6	0.22	13.34	0.057	4.813	1.51613	22.8121	1.31512	1.10528	26.7486	5.66805	0.989	0.394	7.207	31.268
54	348600	4284521	7.307	0.075	1.206	2.744	26.37	20.52	53.11	1.65	50	6	0.921505	10.39	0.111	5.983	0.632893	13.1405	2.8567	0.77181	17.4019	3.63693	1.545	0.602	38.444	41.348
55	348991	4284513	8.277	0.132	1.865	3.829	30.077	21.893	48.03	1.682	50	6	0.91	10.27	0.182	5.809	0.900513	27.426	1.22983	1.31842	30.8747	2.91667	1.306	0.375	8.913	35.363
56	349382	4284506	8.55	0.218	0.944	23.548	22.915	24.961	52.124	1.517	50	6	1.34	10.1	0.114	6.307	2.20073	19.8437	1.62105	0.904856	24.5703	8.95685	0.65	0.586	5.33	26.185
57	349773	4284498	8.543	0.203	1.833	22.974	17.707	24.83	57.464	1.488	50	2	3.37	9.13	0.163	8.299	0.897105	22.6946	1.72403	1.04262	26.3584	3.40349	0.526	0.656	5.496	24.864
58	350164	4284491	8.553	0.152	1.957	18.507	18.782	24.907	56.311	1.449	90	2	1.46	9.62	0.268	7.154	1.05436	19.7485	1.96212	0.725064	23.49	4.48856	0.65	0.436	10.189	51.477
59	350555	4284484	8.667	0.279	2.697	14.423	10.581	12.616	76.804	1.627	50	2	10.61	4.56	0.235	6.432	1.12461	25.6903	5.42295	0.732521	32.9704	3.41097	2.78	0.531	36.556	51.254
60	350946	4284476	8.61	0.135	3.031	5.616	35.886	29.627	34.487	1.456	20	2	0.097	12.89	0.221	6.183	0.596634	27.7077	3.73399	1.33682	33.3752	1.78766	1.007	0.326	4.207	27.583
61	351337	4284469	7.88	0.512	2.4	14.192	28.3	33.464	38.236	1.376	20	2	0.16715	13.27	0.185	17.811	1.12174	23.8441	5.29744	2.35742	32.6207	3.43874	2.234	1.957	18.886	28.473
62	351728	4284462	8.56	0.44	2.174	14.26	30.362	32.5	37.138	1.265	20	2	0.185	13.9	0.2	6.407	1.45918	22.7536	9.9687	1.23248	35.4139	4.12036	1.729	0.348	8.013	19.523
63	351721	4284062	8.16	0.546	3.407	13.934	32.416	36.681	30.903	1.457	20	2	0.153846	13.64	0.213	6.531	1.56007	25.8738	6.8088	0.631854	34.8745	4.47339	2.32	0.735	18.959	33.319
64	351330	4284070	8.38	0.494	3.646	13.888	29.294	33.42	37.286	1.583	20	2	0.09	11.35	0.246	6.058	1.26135	27.2655	7.4912	0.376023	36.3941	3.46581	1.842	1.863	10.291	32.149
65	350939	4284077	8.44	0.393	4.034	14.378	27.986	44.948	27.066	1.204	20	2	0.21	14.71	0.242	5.336	1.46366	26.65	10.1649	0.681882	38.9604	3.75678	1.197	0.663	8.939	19.685
66	350548	4284084	8.433	0.326	3.795	10.757	28.869	41.513	29.618	1.376	20	2	0.25	13.62	0.404	5.809	1.55036	26.4901	10.3928	0.473172	38.9064	3.98484	2.763	0.57	13.634	36.6
67	350156	4284092	8.36	0.131	3.721	11.73	13.576	16.861	69.563	1.686	20	2	9.95	5.26	0.376	4.34	1.40919	23.7927	1.50592	0.442154	27.1499	5.1904	0.205	0.227	2.569	8.13
68	349765	4284099	7.59	0.125	0.654	22.926	20.875	22.922	56.203	1.557	20	2	1.27	8.83	0.059	13.927	0.877196	23.1555	1.57137	3.40725	29.0113	3.02363	1.116	1.383	13.629	51.966
69	349374	4284106	8.367	0.294	1.565	16.376	21.136	25.28	53.585	1.428	50	2	1.52	10.14	0.123	18.508	0.761637	22.8118	3.32281	4.41899	31.3153	2.43216	1.593	3.059	42.156	91.668
70	348983	4284114	7.59	0.106	1.5	18.423	26.234	26.234	47.533	1.476	50	2	1.79	10.68	0.107	24.16	1.41651	23.3945	5.13932	3.06923	33.0195	4.28991	2.563	3.461	29.385	29.955
71	348592	4284121	8.093	0.152	1.611	10.917	23.001	20.947	56.052	1.767	20	6	1.93	7.9	0.101	6.133	0.878147	29.3139	0.686029	1.01092	31.889	2.75376	0.524	0.302	6.859	18.312
72	348201	4284129	7.66	0.133	1.199	16.376	23.105	21.042	55.853	1.613	20	6	0.89	9.23	0.09	5.037	0.50841	27.2155	0.654017	0.705756	29.0837	1.74809	0.593	0.275	7.015	19.669
73	347810	4284136	7.58	0.144	2.227	20.47	35.98	19.593	44.42	1.57	20	6	0.76	9.99	0.101	6.058	0.616402	32.1992	0.741125	0.954287	34.511	1.7861	0.556	0.484	6.245	23.881
74	348194	4283729	7.733	0.144	1.26	20.47	23.141	27.273	49.586	1.457	20	6	0.416162	10.95	0.116	7.204	0.785439	31.0996	0.403375	0.491269	32.7797	2.39611	0.808	1.838	7.015	17.152
75	348585	4283722	7.763	0.128	0.805	26.201	18.887	25.045	56.068	1.448	50	2	2.57	9.96	0.079	7.303	0.832473	26.2704	1.02946	0.804351	28.9367	2.87688	0.429	0.41	5.122	15.467
76	348976	4283714	7.85	0.117	0.537	13.101	18.906	21.988	59.106	1.458	50	2	0.63	9.47	0.065	5.759	1.14687	26.3284	0.498246	0.665282	28.6388	4.00459	0.546	0.253	6.235	11.786
77	349367	4283707	7.967	0.115	1.561	6.96	13.583	10.542	75.874	1.32	50	2	3.93	9.13	0.139	6.457	1.08052	23.2281	2.05448	0.767882	27.131	3.98261	0.166	0.177	4.992	4.781
78	349758	4283699	7.783	0.85	2.916	10.644	27.043	27.043	45.913	1.63	20	2	2.21	9.99	0.399	5.012	1.05278	24.2569	3.69723	1.85374	30.8607	3.41139	2.419	4.013	21.091	92.594
79	350149	4283692	8.183	0.175	3.18	5.732	18.7635	21.611	59.6255	1.485	20	2	1.15	12.19	0.277	22.119	0.962787	26.5153	2.22698	1.27071	30.9758	3.10819	1.379	0.406	7.082	32.601
80	350540	4283685	8.08	0.173	3.032	9.825	16.7413	20.2095	63.0487	1.559	20	2	2.23	10.16	0.221	4.614	0.89527	31.36	3.48269	1.65053	37.3885	2.39451	1.12	0.363	7.639	31.951
81	350931	4283677	7.747	0.113	2.88	2.047	14.719	18.808	66.472	1.483	20	2	2.04	8.64	0.222	5.137	0.783596	16.3952	1.30063	1.28148	19.7609	3.96538	0.75	0.271	8.232	39.424
82	351322	4283670	7.69	0.393	2.849	10.508	13.69	19.81	66.5	1.509	20	2	1.71	14.92	0.263	6.506	0.806204	31.4405	3.27443	1.28173	36.8029	2.1906	1.06	0.304	4.706	20.158
83	351713	4283663	7.987	0.101	1.541	2.047	12.652	20.814	66.534	1.774	20	2	5.29	4.68	0.096	5.784	0.750898	13.8031	1.67083	0.886995	17.1118	4.38819	0.697	0.452	8.138	19.586
84	351315	4283271	8.027	0.147	2.458	12.009	16.986	23.2	59.814	1.448	20	2	0.91	9.44	0.166	5.806	0.737928	31.8604	8.1403	1.58763	42.3263	1.74343	0.804	0.363	4.347	13.767
85	350924	4283278	7.69	0.222	3.996	12.555	31.444	29.375	39.181	1.366	20	2	0.212366	13.01	0.54	6.205	0.756837	30.3452	5.35422	1.00984	37.4661	2.02006	1.041	0.997	14.56	65.45
86	350533	4283285	7.787	0.28	0.928	13.919	27.814	27.814	44.371	1.492	20	2	0.228205	11.42	0.099	5.532	0.773893	27.8041	3.4546	1.12693	33.1596	2.33385	1.536	0.58	11.175	50.978
87	350141	4283293	8.233	0.133	2.598	11.054	24.875	22.408	52.717	1.518	20	1	3.52	10.03	0.263	6.505	1.39897	27.379	2.58515	1.18899	32.5522	4.29762	0.892	0.313	9.318	27.5
88	349750	4283300	8.17	0.188	4.035	22.107	20.357	16.752	62.892	1.58	20	1	8.12	12.15	0.366	6.105	1.22979	35.6162	8.31866	1.76347	46.9281	2.62059	1.761	0.646	11.149	36.647
89	349359	4283307	8.263	0.12	1.238	7.369	10.527	13.564	75.908	1.641	50	2	9.52	4.56	0.097	6.43	1.05799	27.1276	3.99645	1.2934	33.4755	3.16048	0.565	0.696	6.276	18.073
90	348968	4283315	8.44	0.126	1.075	10.371	13.403	15.028	71.569	1.41	50	2	2.51	11.09	0.077	6.53	0.872392	27.3264	4.63943	1.14249	33.9807	2.56732	0.413	0.487	8.622	13.382
91	348577	4283322	8.333	0.115	1.383	24.291	27.956	25.49	46.554	1.56	50	2	0.885185	11.26	0.087	5.756	0.93177	27.7573	2.31426	1.06822	32.0716	2.90529	0.518	0.157	4.139	13.242
92	348186	4283330	8.11	0.107	1.362	12.555	34.351	27.729	37.921	1.329	90	2	0.32	13.72	0.102	6.18	0.807885	29.0097	2.61923	0.867169	33.304	2.42579	1.021	1.857	7.004	24.619
93	347795	4283337	7.877	0.175	3.553	19.651	40.558	26.694	32.748	1.07	90	2	0.04	14.47	0.162	5.931	0.873037	29.1105	2.91883	1.58151	34.4839	2.53172	2.439	0.866	28.616	73.702
94	347411	4283744	8.193	0.107	0.857	14.738	38.313	36.871	24.817	1.294	120	2	0.607843	14.5	0.079	5.157	0.936213	30.006	1.42594	0.814938	33.1831	2.82136	0.622	0.277	6.536	14.287
95	347404	4283344	8.177	0.134	1.203	13.919	33.426	29.299	37.275	1.538	120	2	0.51	12.62	0.117	5.507	1.15571	27.7189	1.62318	1.05881	31.5566	3.66235	0.592	0.199	6.978	17.901
96	347396	4282945	8.1	0.113	2.157	3.685	30.147	31.799	38.053	1.349	120	2	0.18	13.03	0.26	3.635	0.999828	30.6595	1.51299	1.32817	34.5004	2.89802	1.612	0.548	9.521	46.771
97	347787	4282937	8.22	0.271	1.49	21.152	43.755	12.293	43.952	1.19	90	6	0.0671318	12.73	0.133	5.157	1.09616	26.1453	4.42219	1.10461	32.7682	3.3452	1.086	0.444	8.117	27.505
98	348178	4282930	8.24	0.113	1.513	43.669	48.937	27.786	23.277	1.22	90	2	0.09	15.28	0.207	5.132	0.950244	30.5035	5.06522	1.04662	37.5656	2.52956	0.928	0.233	7.727	21.993
99	348569	4282923	8.303	0.124	1.452	28.658	31.654	27.19	41.156	1.519	90	2	0.306011	11.65	0.126	4.983	0.982916	28.1746	3.76123	1.07516	33.9939	2.89145	1.988	0.274	4.482	22.347
100	348961	4282915	8.103	0.105	2.915	15.284	34.153	31.685	34.162	1.295	50	6	0.11	13.38	0.212	5.457	0.975243	33.3105	5.56745	1.05118	40.9043	2.3842	1.87	0.532	10.811	40.828
101	349352	4282908	8.053	0.134	2.818	17.604	36.105	41.849	22.045	1.368	90	2	0.31	15.3	0.217	8.301	1.30016	35.8866	7.493	1.51302	46.1927	2.81465	5.645	0.665	35.329	48.992
102	349743	4282900	8.33	0.151	1.112	25.792	31.89	26.371	41.739	1.35	50	2	0.711323	13.16	0.103	5.956	1.56529	34.0209	0.732392	0.987997	37.3066	4.19574	1.206	0.347	6.115	22.753
103	350134	4282893	8.287	0.129	1.111	18.696	32.27	25.939	41.791	1.453	50	2	0.625	12.59	0.069	6.679	0.89911	29.5638	0.647375	1.34296	32.4532	2.77048	1.34	0.35	6.479	20.74
104	350525	4282886	8.293	0.201	1.172	12.282	34.402	27.03	38.567	1.472	50	2	0.124378	12.9	0.079	6.405	1.01897	30.9438	0.678458	1.10063	33.7418	3.01989	1.326	0.403	7.42	24.755
105	350916	4282878	8.217	0.156	1.229	27.839	27.775	29.408	42.817	1.467	50	6	0.185	11.63	0.074	8.626	1.11096	35.1695	0.489225	0.971764	37.7415	2.94361	0.75	0.337	9.833	12.737
106	351307	4282871	8.223	0.143	2.461	16.649	32.343	33.162	34.495	1.445	90	2	0.35	13.04	0.262	7.603	1.16892	31.8122	1.74723	1.42426	36.1526	3.23328	1.679	0.669	11.648	47.25
107	350909	4282479	8.14	0.203	2.521	10.644	36.7	24.988	38.31	1.485	50	2	0.238095	14.67	0.255	6.056	1.23936	32.3713	1.31128	1.33698	36.2589	3.41808	1.115	0.898	9.313	36.798
108	350518	4282486	7.723	0.13	2.054	2.866	36.497	22.964	40.539	1.441	50	2	0.138889	12.6	0.186	8.102	0.903185	24.0499	1.47525	1.26475	27.6931	3.26141	1.279	0.535	13.712	32.43
109	350126	4282494	8.173	0.108	0.877	3.685	37.954	39.382	22.664	1.441	50	6	0.11	14.35	0.069	6.255	1.83353	29.3852	4.07503	1.01296	36.3067	5.05011	0.837	0.273	9.916	15.176
110	349735	4282501	8.197	0.115	2.146	36.573	33.49	25.066	41.443	1.476	50	6	0.658667	11.92	0.153	4.309	1.48705	36.0628	0.940071	1.95421	40.4442	3.67679	1.727	0.396	10.114	27.864
111	349344	4282508	8.327	0.12	1.845	25.792	36.423	28.033	35.544	1.411	50	20	0.47	13.88	0.116	4.558	1.04376	35.7819	4.51584	1.21549	42.557	2.45263	1.279	0.476	6.833	22.924
112	348953	4282516	8.28	0.129	1.337	15.011	27.775	29.408	42.817	1.467	50	20	0.437	11.63	0.1	4.833	0.919977	34.5465	0.642033	0.851372	36.9599	2.48912	0.785	0.267	9.324	14.017
113	348562	4282523	8.463	0.13	1.867	26.474	34.245	35.06	30.695	1.373	50	20	0.32	14.15	0.085	4.658	0.948448	31.0005	3.27316	0.720074	35.9421	2.63882	2.718	0.332	6.786	19.768
114	348171	4282531	8.247	0.129	2.08	9.962	36.966	29.489	33.545	1.485	50	6	0.106667	11.7082	0.192	5.332	0.84378	34.9406	4.8832	1.66146	42.329	1.99338	1.043	0.394	8.835	30.428
115	347780	4282538	8.333	0.118	1.37	17.331	31.21	32.675	36.11	1.515	50	6	0.089	11.2204	0.134	5.581	0.942821	31.2117	6.04496	1.0776	39.277	2.40044	1.255	0.328	6.386	20.506
116	347388	4282545	8.26	0.117	1.315	19.651	38.223	26.527	35.25	1.471	120	2	0.307692	13.36	0.158	5.482	1.34122	37.3549	1.15334	0.925285	40.7748	3.28934	1.179	0.27	7.68	19.066
117	346997	4282553	8.207	0.121	1.915	27.02	30.476	28.211	41.313	1.403	120	2	0.222047	12.36	0.17	6.629	1.02092	32.631	0.484542	0.865149	35.0016	2.91677	1.132	0.378	10.369	24.744
118	346207	4282169	8.113	0.148	2.521	32.752	27.775	29.408	42.817	1.467	120	2	0.321	11.63	0.345	4.234	0.778817	31.2739	0.4582	1.22337	33.7343	2.30868	1.19	0.882	9.142	39.647
119	346598	4282161	8.123	0.131	1.719	14.329	31.683	27.334	40.983	1.451	120	2	0.22807	12.03	0.15	5.307	1.17832	30.8664	4.38914	1.36955	37.8034	3.11698	1.996	0.494	12.974	19.289
120	346990	4282153	7.833	0.197	2.274	20.743	36.732	29.303	33.966	1.668	120	2	0.19	12.12	0.166	4.284	0.619409	26.1596	0.970996	1.58978	29.3398	2.11116	1.926	0.795	12.849	75.013
121	347381	4282146	8.707	0.307	3.365	20.06	40.838	29.288	29.875	1.17	120	2	0.06	13.73	0.259	4.434	1.95461	26.6743	2.8077	2.38417	33.8208	5.77933	1.495	0.277	7.493	20.22
122	347772	4282138	9.82	1.267	0.753	39.438	25.894	28.726	45.38	1.714	90	2	0.35	9.76	0.069	3.685	3.48339	30.8703	5.18817	1.24124	40.7831	8.54125	1.396	0.546	4.087	11.562
123	348163	4282131	8.577	0.155	1.989	36.846	36.123	32.876	31.001	1.568	20	6	0.17541	13.48	0.124	4.134	2.82918	33.537	6.51369	1.08532	43.9652	6.43505	1.995	0.512	7.129	22.456
124	348554	4282124	8.44	0.138	1.276	36.026	34.5	26.94	38.56	1.57	20	20	0.26	14.62	0.086	5.656	1.32956	27.5559	2.84563	0.72991	32.461	4.09588	1.164	1.445	10.743	22.706
125	348945	4282116	8.67	0.124	1.754	36.845	34.574	27.166	38.26	1.578	20	20	0.224932	12.35	0.105	5.032	1.17886	38.4006	2.23511	1.03427	42.8488	2.75121	2.173	0.276	7.675	20.407
126	349337	4282109	8.1	0.145	1.897	16.921	36.2	27.974	35.83	1.102	20	20	0.185	14.75	0.202	4.409	1.21983	36.5766	6.99673	0.955554	45.7487	2.66636	1.254	0.252	11.055	30.781
127	349728	4282101	8.273	0.08	1.828	1.638	24.106	20.837	55.057	1.58	20	20	0.758706	4.23	0.185	4.034	1.13047	13.3957	5.1362	0.792779	20.4551	5.52657	1.882	0.448	10.826	31.957
128	350119	4282094	8.307	0.125	1.272	27.565	39.135	29.56	31.305	1.602	50	6	0.0710667	13.2	0.115	3.959	0.89383	35.2827	4.92036	0.853885	41.9508	2.13066	2.549	0.266	8.518	20.413
129	350510	4282087	8.147	0.115	2.032	2.047	27.5	20.19	52.3	1.5	50	2	1.96	9.98	0.16	6.031	1.40514	24.7442	1.22982	1.65893	29.0381	4.83895	4.447	0.484	9.698	24.599
130	350503	4281687	8.447	0.142	2.297	32.751	21.73	19.78	58.79	1.483	20	6	2.24	10.9	0.164	4.808	1.23068	36.9136	1.30886	0.867262	40.3204	3.05225	2.665	0.367	9.693	22.051
131	350111	4281695	8.59	0.11	1.014	38.209	28.139	22.837	49.024	1.686	20	6	3.17	10.13	0.064	4.808	1.13472	28.7271	4.03803	0.836615	34.7364	3.26666	0.391	0.559	6.443	16.232
132	349720	4281702	8.4	0.121	2.13	41.484	27.5	20.19	52.3	1.5	20	20	2.87	9.98	0.159	4.908	1.47402	33.0569	7.58466	1.17165	43.2872	3.4052	1.585	1.518	8.304	20.86
133	349329	4281709	8.457	0.119	1.437	27.292	21.73	19.78	58.79	1.483	20	20	3.08	10.9	0.065	2.612	2.42006	35.7521	0.615204	1.89066	40.678	5.94931	0.977	0.54	6.672	18.166
134	348938	4281717	9.113	0.147	1.124	37.117	28.12	23.36	48.522	1.42	20	6	2.89	10.59	0.104	5.357	2.68506	26.5405	0.475112	1.03713	30.7378	8.73538	0.711	0.343	5.226	13.965
135	348547	4281724	8.397	0.129	1.322	42.576	27.16	21.144	51.7	1.221	20	6	0.39	13.66	0.129	3.835	1.90478	36.6116	2.35558	1.22795	42.0999	4.52441	1.52	0.339	8.793	17.059
136	348156	4281732	8.04	0.084	1.426	2.047	28.271	16.799	54.93	1.67	20	6	1.61	9.22	0.172	3.71	1.48912	25.1674	1.72655	1.86001	30.2431	4.92385	1.883	0.324	11.248	34.375
137	347764	4281739	8.327	0.086	3.112	16.375	35.049	21.28	43.671	1.602	120	2	0.11	11.57	0.277	2.787	1.08498	28.7196	1.88257	1.3145	33.0017	3.28764	1.409	0.179	11.17	28.504
138	347373	4281746	8.303	0.211	2.019	15.284	28.424	31.307	40.269	1.673	120	2	0.301075	10.39	0.276	4.458	1.01562	28.6548	3.06831	2.17621	34.9149	2.90884	1.609	0.299	10.02	46.959
139	346982	4281754	8.437	0.217	1.489	15.83	28.358	31.235	40.407	1.695	120	2	0.313978	10.1	0.13	4.483	1.46599	23.9104	6.61234	1.53364	33.5223	4.37316	1.442	0.309	10.509	48.025
140	346591	4281761	8.567	0.157	0.669	14.738	27.798	28.206	43.996	1.051	120	2	0.386022	13.77	0.049	4.508	1.25658	31.1986	4.44105	1.65381	38.55	3.25962	1.344	0.307	12.137	31.811
141	346200	4281769	9.397	1.265	0.673	9.006	32.644	31.404	35.952	1.53	90	2	0.51	13	0.129	5.357	5.30998	36.0982	3.18118	1.61511	46.2044	11.4924	1.354	0.468	12.095	34.453
142	345808	4281777	8.503	1.11	0.927	10.644	36.776	31.404	31.82	1.197	90	2	0.21447	14.69	0.095	4.159	1.20513	39.0023	1.05918	1.57109	42.8377	2.81324	0.931	0.283	9.084	17.844
143	345417	4281784	8.533	1.106	0.581	14.981	28.1	30.58	41.32	1.54	90	2	0.342	11.72	0.036	4.783	2.028	39.458	1.29436	0.978287	43.7586	4.63451	0.992	0.506	5.361	12.441
144	345026	4281792	8.4	0.103	1.204	6.302	30.512	25.152	44.336	1.681	90	2	0.128	10.69	0.081	5.264	1.13708	21.0949	1.06143	0.667803	23.9612	4.74548	1.85	0.208	10.676	30.35
145	344635	4281799	8.6	1.11	0.853	10.35	36.842	27.321	35.837	1.47	90	2	0.860215	10.04	0.051	4.908	1.26161	38.4589	1.83934	1.4707	43.0306	2.9319	0.741	0.618	6.791	21.25
146	344627	4281400	8.753	1.092	0.604	22.062	13.779	12.563	73.657	1.66	90	2	6.12	2.69	0.064	4.184	1.52803	29.92	0.159242	1.40705	33.0143	4.62839	1.019	0.336	5.944	18.265
147	345018	4281392	8.503	0.123	0.554	21.245	19.817	19.404	60.779	1.433	90	2	7.27	9.81	0.056	4.958	1.28214	32.6725	3.571	0.982446	38.5081	3.32955	2.173	0.217	6.022	17.147
148	345410	4281385	8.43	0.165	0.848	7.218	30.677	31.506	37.817	1.481	90	2	0.106061	12.09	0.077	3.835	1.35632	31.2669	1.16585	1.31778	35.1068	3.8634	1.254	0.339	5.814	24.671
149	345801	4281377	8.717	0.114	0.592	5.311	24.153	24.972	50.875	1.5	90	2	4.15	9.98	0.046	2.961	1.56341	25.351	0.909508	1.10493	28.9289	5.40433	1.287	0.328	5.33	16.565
150	346192	4281370	8.13	0.113	0.655	8.58	25.815	24.995	49.19	1.474	90	2	2.93	10.5	0.047	5.082	1.17752	33.3954	1.20675	1.39052	37.1702	3.16791	1.261	0.443	6.755	24.323
151	346583	4281362	8.1	0.158	1.855	15.525	30.076	33.372	36.553	1.531	120	2	0.256	12.66	0.117	3.361	1.36052	34.4079	4.98928	1.24713	42.0048	3.23896	1.129	0.687	7.415	27.911
152	346974	4281354	8.473	0.112	0.952	16.206	23.748	24.976	51.276	1.873	120	2	1.79	7.32	0.071	3.959	0.931493	30.6771	1.75067	1.14273	34.502	2.69982	0.772	0.523	6.282	18.78
153	347366	4281347	8.43	0.128	0.896	17.16	32.086	29.206	38.708	1.266	120	2	0.24	13.7	0.041	4.683	1.42861	34.3791	4.42621	1.66105	41.895	3.40997	1.319	0.396	6.178	22.607
154	347757	4281339	8.513	0.152	0.592	6.265	23.62	22.805	53.575	1.396	120	2	1.64323	11.07	0.054	4.683	1.4105	30.826	1.7653	1.95178	35.9536	3.92311	0.696	0.569	7.171	18.411
155	348148	4281332	8.033	0.151	0.829	6.537	27.717	22.826	49.457	1.673	120	2	0.59823	9.72	0.081	3.485	1.33952	29.9751	1.68256	1.95095	34.9482	3.83289	0.77	0.601	5.559	17.755
156	348539	4281325	8.55	0.084	1.178	3.132	19.458	20.674	59.868	1.503	120	2	6.44	9.03	0.142	3.136	1.42874	27.5157	4.93079	1.76892	35.6441	4.00835	1.664	0.516	7.41	21.915
157	348930	4281317	8.593	0.1	0.884	6.128	19.47	24.743	55.786	1.844	120	2	5.2	5.78	0.079	3.161	1.32791	32.3461	1.06291	0.886069	35.623	3.72766	1.635	0.42	9.168	28.483
158	349322	4281310	8.49	0.084	1.54	3.268	23.65	18.757	57.593	1.699	120	2	1.83	7.8	0.211	3.311	1.21074	26.2815	1.84935	0.943087	30.2847	3.99785	1.524	0.245	9.901	32.378
159	349713	4281302	8.693	0.105	1.483	16.342	25.73	19	55.23	1.483	120	2	1.86	10.9	0.129	5.332	1.22657	30.2649	0.820433	0.830054	33.142	3.70095	1.515	0.634	7.717	28.369
160	350104	4281295	8.5	0.11	1.183	20.973	23.62	22.805	53.575	1.56	120	2	1.07031	9.17	0.086	5.307	0.992073	32.4834	0.924475	1.00081	35.4008	2.80241	0.832	0.482	7.55	13.975
161	350495	4281288	8.53	0.14	1.2	16.751	24.15	14.736	61.114	1.24	120	2	2.58	11.61	0.092	4.059	1.25657	40.0665	1.41779	1.50382	44.2447	2.84004	1.835	0.501	5.273	20.563
162	350488	4280888	8.763	0.32	0.946	2.043	30.402	25.061	44.536	1.49	120	2	0.472678	10.09	0.087	3.336	1.15433	22.8773	0.932787	1.45114	26.4155	4.36988	0.957	0.817	6.318	19.867
163	350096	4280896	8.66	0.106	1.184	6.537	30.557	25.189	44.255	1.43	120	2	0.402116	11.13	0.074	5.007	1.22826	28.376	0.799621	1.20393	31.6078	3.88593	0.981	1.896	5.455	17.698
164	349705	4280903	8.207	0.093	0.78	4.903	14.9393	15.279	69.7817	1.48	120	2	5.75	12.75	0.053	4.209	1.50303	36.5653	2.61667	1.49568	42.1807	3.56331	1.238	0.637	7.415	22.165
165	349314	4280910	8.207	0.085	1.185	1.226	19.577	12.644	67.779	1.52	120	2	4.61	2.98	0.071	6.105	1.39398	15.8985	3.03073	1.10348	21.4266	6.50582	0.404	0.393	7.4	16.284
166	348923	4280918	8.253	0.099	1.378	1.634	25.99	27.228	46.782	1.69	120	2	0.571	11.05	0.147	4.259	1.57383	24.7465	1.83848	1.35559	29.5144	5.33243	1.236	0.395	7.79	27.339
167	348532	4280925	8.387	0.151	1.197	1.634	24.935	24.111	50.954	1.629	120	2	0.99	9.32	0.121	2.038	1.88072	23.0402	1.91761	1.38216	28.2207	6.66434	0.745	0.253	10.182	32.529
168	348140	4280933	8.613	0.111	1.646	3.268	25.955	25.543	48.502	1.479	120	2	0.57	10.74	0.149	2.263	1.99874	25.131	1.92942	0.917713	29.9769	6.66761	0.705	0.432	8.518	28.337
169	347749	4280940	8.397	0.102	0.893	4.086	23.769	21.31	54.921	1.561	120	2	2.76613	9.15	0.07	3.91	0.993963	33.1531	2.98462	0.984872	38.1166	2.60769	5.064	0.332	19.417	47.281
170	347358	4280947	8.16	0.136	0.795	16.07	24.502	25.332	50.166	1.55	120	2	1.83	12.64	0.057	5.066	1.44688	37.6757	5.78835	1.70371	46.6147	3.10393	3.327	0.187	18.46	34.765
171	346967	4280955	7.86	0.16	2.001	13.891	28.229	24.956	46.815	1.64	120	2	0.89	12.26	0.126	5.611	1.25154	34.263	2.7424	1.81165	40.0686	3.12349	1.141	0.432	7.514	20.563
172	346575	4280962	8.017	0.16	1.498	10.623	26.148	22.879	50.973	1.58	120	2	0.548	11.07	0.112	5.561	1.41413	28.5178	3.28079	1.75779	34.9705	4.04379	2.741	0.261	10.951	28.275
173	346184	4280970	8.21	0.097	1.361	7.354	29.741	23.223	47.036	1.621	90	2	0.983333	10.82	0.062	2.737	1.63805	30.7667	1.16551	0.980077	34.5504	4.74104	1.867	0.252	17.628	63.073
174	345793	4280978	8.58	0.123	1.135	13.891	32.078	19.329	48.593	1.695	90	2	0.609375	10.46	0.105	6.23	1.81459	35.1465	6.93486	1.70423	45.6002	3.97934	2.695	0.285	8.19	21.193
175	345402	4280985	8.55	0.426	1.095	7.354	23.648	22.833	53.52	1.48	90	2	1.27	12.56	0.107	5.611	4.8218	35.4781	4.18512	2.31022	46.7953	10.304	0.931	0.41	7.821	17.194
176	345011	4280993	8.25	0.202	2.115	14.3	19.538	14.653	65.809	1.373	90	2	4.45	10.05	0.255	3.356	2.58549	33.2952	5.75401	1.46885	43.1035	5.99833	1.141	0.346	10.104	21.817
177	344619	4281000	7.8	0.148	1.404	20.156	17.93	16.708	65.362	1.656	90	2	3.54	6.48	0.125	8.261	1.16487	35.0239	9.01601	2.22342	47.4282	2.45607	1.47	0.555	12.444	22.893
178	345003	4280593	8.08	0.118	2.488	6.537	27.888	25.428	46.684	1.552	90	2	0.5694	10.9	0.34	5.264	1.2275	38.3864	1.4811	1.57079	42.6658	2.877	1.491	0.416	7.478	16.232
179	345394	4280586	8.587	0.356	3.522	11.712	22.024	22.839	55.137	1.488	90	2	1.02	10.06	0.307	5.735	2.63468	28.9038	7.48089	1.86676	40.8861	6.44394	2.022	0.636	18.782	28.093
180	345785	4280578	8.597	0.168	3.524	19.202	39.585	37.031	23.385	1.401	120	2	0.062	14.4	0.257	8.311	3.12423	25.4982	9.451	1.82155	39.895	7.83113	1.098	0.55	21.954	43.521
181	346177	4280571	8.613	0.152	2.122	13.891	32.788	23.39	43.82	1.41	120	2	0.19	13.34	0.163	6.032	1.20709	33.0058	3.40678	1.95752	39.5772	3.04997	1.642	0.668	6.557	26.523
182	346568	4280563	8.433	0.125	1.469	12.802	36.355	29.332	34.314	1.395	120	2	0.35	13.75	0.135	4.843	1.22472	37.857	3.19035	1.59763	43.8697	2.79173	2.315	0.468	7.654	24.292
183	346959	4280555	8.313	0.139	1.943	9.669	28.811	25.518	45.671	1.665	120	2	0.419672	10.51	0.121	5.908	1.66369	29.3104	2.26651	1.79532	35.0359	4.74854	1.797	0.36	8.232	36.512
184	347350	4280548	8.377	0.137	1.496	6.128	39.145	21.427	39.429	1.35	120	2	0.17	12.25	0.101	6.503	1.9779	28.409	2.85854	0.841744	34.0872	5.80248	0.784	0.294	12.23	23.938
185	347741	4280540	8.3	0.138	2.194	13.074	23.081	17.626	59.293	1.482	120	2	1.94	9.7	0.132	7.543	1.22887	33.7232	4.31926	1.73698	41.0083	2.99663	0.524	0.389	7.441	21.941
186	348133	4280533	8.777	0.146	2.071	11.031	36.303	28.671	35.026	1.24	90	2	0.0973451	12.38	0.22	5.933	1.14711	27.958	1.10669	1.43852	31.6503	3.62434	0.564	0.237	6.916	31.187
187	348524	4280526	9.04	0.157	1.18	18.085	18.285	21.129	60.586	1.45	90	2	9.46	10.15	0.119	4.199	0.994676	30.7384	3.99113	1.47097	37.1952	2.6742	0.789	0.509	6.531	11.978
188	348915	4280518	8.69	0.133	1.712	6.439	22.356	10.975	66.669	1.65	90	2	18.72	8.69	0.155	5.165	1.9061	24.5926	1.00786	1.49301	28.9996	6.57285	1.486	0.358	8.819	29.398
189	349306	4280511	8.7	0.113	0.738	8.221	22.364	17.078	60.559	1.67	90	2	3.38	7.47	0.058	5.388	1.94501	28.175	1.7643	0.844631	32.7289	5.94279	1.395	0.747	7.004	19.201
190	349698	4280503	9.05	0.134	1.313	17.811	47.243	30	23	1.03	90	2	0.02	15.9	0.094	6.403	3.20754	30.0748	3.12527	1.23379	37.6414	8.52132	1.311	0.405	11.492	23.564
191	350089	4280496	8.52	0.102	1.211	9.728	39.604	34.184	26.212	1.423	120	2	0.13	14.98	0.076	6.874	1.2567	37.7133	1.5586	1.54296	42.0716	2.98705	2.005	0.341	9.818	38.571
192	350480	4280489	8.04	0.085	1.533	8.495	33.102	33.93	32.968	1.425	120	2	0.102	13.74	0.115	5.635	1.12001	18.1075	2.28121	1.59354	23.1022	4.84807	2.089	0.398	10.873	39.486
193	350871	4280481	7.747	0.105	1.862	3.014	31.019	26.676	42.305	1.575	120	2	0.396	11.74	0.085	6.057	1.25402	21.8942	1.78638	1.56045	26.495	4.73304	0.953	0.297	8.856	38.857
194	351255	4280075	8.3	0.164	1.791	12.879	32.889	23.433	43.678	1.577	120	2	0.162	11.73	0.165	5.289	1.85849	33.6331	1.63658	1.19386	38.322	4.84967	0.828	0.268	11.279	29.419
195	350864	4280082	8.27	0.166	1.918	10.413	36.115	36.94	26.945	1.313	120	2	0.111	14.58	0.187	6.28	1.42696	33.0838	2.02919	1.08606	37.6261	3.79248	1.128	0.304	12.386	30.313
196	350473	4280089	8.497	0.133	0.713	11.098	26.182	14.727	59.091	1.557	120	2	2.16	9.37	0.086	7.048	1.11874	28.073	1.93484	0.943867	32.0705	3.48838	1.115	0.277	8.263	21.723
197	350081	4280097	8.27	0.159	1.209	11.098	45.348	32.659	21.994	1.02	120	2	0.06	15.21	0.107	8.361	1.78597	31.5221	3.04172	1.47764	37.8274	4.72138	1.275	0.333	6.869	26.595
198	349690	4280104	8.37	0.125	0.708	6.028	23.982	14.633	61.385	1.608	120	2	4.96	8.27	0.097	8.138	0.860151	18.2216	0.997517	1.00837	21.0876	4.07893	0.925	0.384	7.171	24.635
199	349299	4280111	8.617	0.134	0.868	14.386	24.224	25.045	50.731	1.367	120	2	0.172	11.3	0.076	3.976	1.16353	24.6917	1.64875	1.36512	28.8691	4.03035	0.909	0.256	9.37	20.433
200	348908	4280119	8.56	0.103	1.138	11.92	30.349	27.068	42.583	1.545	120	2	0.362	11.12	0.083	5.809	1.05565	29.4205	3.57482	1.12135	35.1723	3.00136	1.587	0.505	8.564	26.148
201	348516	4280126	8.58	0.115	0.721	13.838	38.691	26.137	35.172	1.483	120	2	0.128205	13.87	0.056	6.23	1.13543	29.3293	0.6214	0.950979	32.0371	3.54411	1.132	0.603	6.516	24.489
202	348125	4280134	8.527	0.108	0.84	6.302	34.402	27.03	38.567	1.472	120	2	0.224806	12.9	0.077	4.199	1.33272	23.4882	0.976583	0.918472	26.716	4.98848	1.841	0.227	9.251	21.021
203	347734	4280141	8.42	0.087	0.926	3.288	23.112	19.84	57.048	1.679	120	2	1.13	8.44	0.058	6.354	1.21512	12.8297	1.0476	0.452236	15.5447	7.81694	1.562	0.838	11.222	31.026
204	347343	4280148	8.507	1.114	0.84	3.541	35.217	31.902	32.881	1.44	120	2	0.17	12.33	0.057	6.58	1.41314	26.8325	1.48032	1.37182	31.0978	4.5442	1.354	0.887	7.493	20.34
205	346951	4280156	8.537	0.118	1.156	6.714	35.64	23.073	41.287	1.45	120	2	0.12	11.44	0.069	5.487	1.69618	30.1761	2.31104	1.26986	35.4531	4.78428	1.263	0.341	9.334	34.603
206	346560	4280163	8.463	0.102	1.151	4.126	35.275	15.355	49.37	1.508	120	1	0.911	11.58	0.122	3.455	0.990101	27.5467	1.1888	0.953431	30.6791	3.22729	1.047	0.527	9.365	34.91
207	346169	4280171	8.45	0.105	1.152	3.989	35.312	18.487	46.202	1.56	120	1	0.489583	11.56	0.117	4.471	1.46779	27.1749	1.3006	0.871179	30.8145	4.76331	1.191	0.502	10.13	31.156
208	345778	4280179	8.383	0.113	1.427	2.889	35.352	14.75	49.9	1.512	120	1	0.510753	12.28	0.129	3.183	0.925254	22.7094	5.15268	0.543977	29.3313	3.15449	2.453	0.285	11.086	51.592
209	345386	4280186	8.597	0.106	0.997	5.227	37.48	15.08	47.44	1.539	120	1	0.86398	12.2	0.078	4.273	1.04849	25.7738	3.85295	1.79819	32.4734	3.22875	1.939	0.331	9.563	25.363
210	344995	4280194	9.02	0.365	2.296	14.03	39.329	27.737	32.934	1.226	120	2	0.0666667	13.77	0.164	7.642	2.57774	23.322	2.61298	2.66625	31.179	8.26755	2.074	0.297	10.369	26.252
211	344604	4280201	8.677	0.161	2.285	13.48	35.952	30.454	33.594	1.512	120	2	0.077	13.66	0.143	3.53	1.22596	26.7346	7.01806	1.69424	36.6729	3.34297	2.177	0.365	9.298	19.596
212	344596	4279802	8.657	0.113	2.199	10.179	39.214	31.784	29.002	1.549	120	2	0.06	14.21	0.165	5.561	0.918863	27.0199	4.15033	1.36223	33.4514	2.74686	1.655	0.28	9.916	25.748
213	344987	4279794	8.55	0.139	2.069	6.602	41.693	25.85	32.457	1.621	120	2	0.0512821	13.87	0.094	4.521	0.983941	24.689	4.39082	1.53207	31.5958	3.11415	1.952	0.421	10.847	25.098
214	345379	4279787	8.427	0.109	0.84	2.476	15.43	17.49	67	1.69	120	1	6.89	6.71	0.077	4.149	1.68152	20.1922	1.48486	0.849431	24.2081	6.94613	1.645	0.257	9.818	41.228
215	345770	4279779	8.47	0.088	0.839	2.338	24.63	23.399	51.971	1.62	120	1	1.35	9.46	0.082	5.487	1.25215	22.5875	0.808192	0.514941	25.1628	4.9762	1.754	0.32	9.017	27.739
216	346161	4279772	8.467	0.103	0.843	5.364	19.514	15.855	64.632	1.48	120	1	6.56	6.63	0.101	4.942	1.61989	29.6339	1.08933	1.42197	33.7651	4.79752	1.518	0.356	9.053	34.354
217	346552	4279764	8.097	0.084	0.791	1.651	16.674	30.014	53.312	1.593	120	1	0.95	8.32	0.07	0.17	1.2391	14.9518	1.08687	0.755874	18.0337	6.87102	1.29	0.444	8.424	28.322
218	346944	4279756	8.637	0.12	1.028	11.279	35.217	31.902	32.881	1.52	120	1	0.57	12.33	0.141	4.768	1.43789	27.6023	2.23045	1.02548	32.2961	4.45219	1.806	0.559	8.481	21.089
219	347335	4279749	7.987	0.138	1.32	4.126	24.652	20.954	54.394	1.627	120	1	1.83	8.77	0.115	4.248	0.847326	19.863	1.48488	0.933749	23.129	3.66349	2.336	0.446	11.643	31.905
220	347726	4279742	7.807	0.09	1.016	1.651	24.569	18.836	56.594	1.69	50	6	1.74	8.54	0.074	5.239	0.880828	17.8613	1.0318	1.1031	20.8771	4.21912	1.321	0.289	11.014	36.616
221	348118	4279734	7.913	0.075	1.076	1.651	26.607	18.83	54.563	1.72	90	2	1.98	7.72	0.083	3.852	0.857954	15.6187	0.678175	1.13662	18.2915	4.69046	1.216	0.849	7.649	41.109
222	348509	4279727	8.437	0.081	0.955	1.651	26.573	18.806	54.621	1.79	90	2	1.46615	6.71	0.088	3.232	0.944209	12.7696	3.50864	0.700774	17.9232	5.26808	1.04	0.721	12.563	52.991
223	348900	4279719	8.35	0.042	0.895	1.651	23.703	12.669	63.628	1.58	90	2	10.57	6.19	0.056	3.01	0.825212	14.4842	2.64894	0.533944	18.4923	4.46247	1.546	0.167	9.974	30.204
224	349291	4279712	8.353	0.082	1.107	1.651	27.882	20.912	51.206	1.81	90	2	0.687	6.92	0.075	6.057	1.13869	16.3824	1.15563	1.64434	20.321	5.60349	0.981	0.231	11.684	56.651
225	349683	4279704	8.35	0.074	1.045	1.651	54.38	33.119	12.502	1.27	90	2	0.03	17.26	0.063	4.991	1.35343	20.6136	0.990183	1.5497	24.5069	5.52265	1.326	0.256	7.686	48.087
226	350074	4279697	8.42	0.065	1.159	15.681	60.826	28.636	10.538	1.12	90	2	0.03	18.59	0.123	5.611	0.676097	27.7318	6.07056	1.99221	36.4707	1.85381	1.448	0.214	10.587	30.891
227	350465	4279690	8.483	0.129	1.207	14.348	32.985	29.686	37.329	1.45	90	2	0.1875	11.71	0.122	7.394	1.34772	23.562	3.40618	1.80636	30.1223	4.47415	0.924	0.254	10.228	29.747
228	350066	4279298	8.13	0.092	0.927	18.763	20.19	16.27	63.54	1.68	90	6	11.75	12.15	0.084	4.868	1.13995	24.6772	2.09012	0.804597	28.7118	3.97031	0.963	0.266	9.506	20.163
229	349675	4279305	8.313	0.142	1.668	1.656	27.894	27.074	45.031	1.66	90	1	3.76	12.45	0.131	4	1.70929	16.9232	3.14234	1.86631	23.6411	7.23017	1.227	0.575	24.58	85.491
230	349284	4279312	8.24	0.116	1.729	2.483	25.729	20.828	53.443	1.79	90	2	2.57	5.57	0.123	4.496	0.149642	16.051	1.38966	1.21201	18.8023	0.795869	1.7	0.715	12.917	64.535
231	348892	4279320	8.253	0.144	2.001	2.897	25.774	22.91	51.316	1.7	90	2	3.9	7.09	0.126	3.802	0.776303	15.7194	3.06382	0.722992	20.2825	3.82745	1.407	0.666	25.163	74.066
232	348501	4279327	8.033	0.054	0.744	2.069	23.641	16.712	59.647	1.559	90	2	2.16	9.4	0.056	3.827	0.949264	15.7349	1.8623	0.882318	19.4287	4.88588	1.527	0.35	10.218	37.5
233	348110	4279335	8.213	0.102	1.308	10.209	26.68	15.682	57.638	1.68	90	2	1.06	7.84	0.059	5.809	1.1479	18.9642	1.10894	1.13255	22.3536	5.1352	1.571	0.519	10.811	34.011
234	347719	4279342	8.3	0.076	0.71	11.589	21.592	20.777	57.63	1.668	90	2	1.12	8.15	0.065	4.397	1.05765	23.3408	0.451988	0.706523	25.557	4.13838	1.198	2.948	10.603	30.859
235	347327	4279349	8.117	0.116	1.134	8.83	27.963	27.14	44.897	1.571	90	1	0.207071	10.74	0.111	3.579	1.36953	25.6118	0.928058	1.32085	29.2303	4.68532	1.363	0.309	8.055	52.569
236	346936	4279357	8.19	0.102	0.9	10.071	27.962	32.28	39.759	1.58	90	1	0.192	10.38	0.108	1.92	1.24873	27.4783	0.965546	1.22996	30.9226	4.03825	0.829	3.216	11.081	38.483
237	346545	4279364	8.22	0.092	0.896	4.139	29.854	24.947	45.199	1.72	90	1	0.257812	9.41	0.08	2.167	1.3248	24.859	1.34759	0.710708	28.2421	4.69088	1.081	0.298	9.937	32.763
238	346153	4279372	8.303	0.066	0.889	3.725	25.72	14.697	59.583	1.71	90	1	2.96	7.03	0.122	2.687	1.83588	14.6096	1.04864	0.760631	18.2548	10.057	2.671	0.361	9.802	39.705
239	345762	4279380	8.35	0.07	0.651	1.656	27.584	14.603	57.813	1.62	90	1	2.15	6.94	0.057	4.347	1.17799	16.7247	1.03463	1.17875	20.1161	5.85597	1.386	0.352	18.736	59.792
240	345371	4279387	8.223	0.102	1.335	2.483	21.534	10.564	67.901	1.681	90	1	18.75	8.06	0.097	3.877	1.20597	15.8239	0.669596	1.15606	18.8556	6.39582	2.723	0.58	13.151	56.085
241	344979	4279395	8.88	0.611	2.736	2.483	41.01	35.994	22.989	1.02	90	1	0.04	15.54	0.211	3.926	3.26175	21.6082	3.50004	2.31443	30.6844	10.63	1.057	0.327	54.98	157.583
242	344588	4279402	8.567	0.513	3.926	13.244	41.385	36.317	22.298	1.05	90	1	0.05	15.33	0.362	4.744	1.03322	23.0585	1.78824	1.2657	27.1456	3.80621	1.149	0.317	52.229	139.3
243	344972	4278995	8.747	0.323	1.938	15.728	42.398	25.11	32.492	1.13	90	1	0.07	12.81	0.121	4.223	0.560867	22.1469	3.79257	2.69659	29.197	1.92098	0.873	0.247	12.6	39.861
244	345363	4278988	8.65	0.257	3.019	27.041	36.115	36.94	26.945	1.313	90	2	0.55	14.58	0.383	6.849	1.05931	21.1616	3.47012	2.41096	28.102	3.76953	1.232	0.378	21.336	79.859
245	345754	4278980	8.53	0.44	3.677	11.175	36.223	24.286	39.49	1.464	90	2	0.217391	13.1	0.321	4.942	2.36403	36.381	4.9494	2.38579	46.0802	5.13025	0.729	0.6	47.008	59.589
246	346146	4278972	8.53	0.117	1.182	16.556	22.581	21.768	55.651	1.613	90	1	1.37	8.78	0.126	4.248	0.564066	16.3724	1.13708	0.899292	18.9729	2.97301	3.512	1.4	8.798	22.347
247	346537	4278965	8.53	0.643	0.947	7.45	27.963	27.14	45	1.571	90	2	0.375	11.28	0.096	4.075	0.610622	13.1572	1.1003	0.833872	15.702	3.88881	2.249	1.26	10.514	42.897
248	346928	4278957	8.45	0.73	0.769	2.069	24.638	14.864	60.497	1.63	90	1	3.04	6.56	0.07	4.669	0.434466	11.4822	0.969558	0.790049	13.6763	3.17677	1.11	0.67	7.987	37.235
249	347320	4278950	8.32	0.065	0.768	1.38	23.586	15.859	60.555	1.72	90	1	3.27	5.4	0.06	5.413	0.186182	11.7395	1.32547	0.939049	14.1902	1.31205	4.96	2.217	10.65	42.689
250	347711	4278942	8.253	0.064	0.888	1.518	25.666	11.814	62.52	1.727	90	1	5.36	8.86	0.063	6.081	0.987743	12.2279	0.869067	0.727792	14.8125	6.66832	4.322	1.41	7.862	30.246
251	348102	4278935	8.193	0.058	1.013	2.483	29.954	18.054	51.992	1.61	90	1	1.29	8.52	0.064	6.131	1.73493	15.4931	1.00547	0.727279	18.9608	9.1501	1.354	0.367	8.84	33.974
252	348494	4278928	8.64	0.075	0.829	1.656	23.649	22.018	54.332	1.62	90	1	1.96	6.61	0.062	5.115	0.202875	12.4523	0.520437	0.356436	13.532	1.49922	0.619	0.296	9.542	30.454
253	348885	4278920	8.64	0.082	0.9	4.967	20.63	19.4	59.97	1.62	90	1	3.17	9.46	0.041	5.487	0.323211	25.3986	0.776633	0.506664	27.0051	1.19685	0.566	0.218	9.1	21.895
254	349276	4278913	8.403	0.042	0.77	4.967	23.655	22.024	54.321	1.64	90	1	1.77	7.22	0.071	4.818	0.238484	18.8972	0.992008	0.684859	20.8126	1.14587	1.165	0.225	8.544	22.888
255	349269	4278513	8.413	0.296	0.827	2.069	25.3	19.6	55.1	1.58	90	2	0.59	12.34	0.081	4.843	0.441572	12.4199	0.634358	0.497882	13.9937	3.15551	1.482	0.486	7.774	24.853
256	345747	4278581	8.4	0.11	0.98	9.933	20.21	21.43	58.36	1.59	90	2	3.13	12.81	0.118	4.223	2.51558	23.4428	0.944517	0.632387	27.5353	9.13582	0.733	0.347	11.554	30.849
257	345355	4278588	8.42	0.293	0.802	9.657	20.649	19.014	60.337	1.787	90	2	3.15	6.25	0.071	5.19	1.46562	23.2533	1.013	0.729108	26.461	5.5388	1.006	0.354	9.292	28.696
258	344964	4278596	8.397	0.083	0.739	11.589	21.568	26.045	52.387	1.71	90	1	1.91	5.72	0.101	8.707	1.41881	20.681	0.906113	0.751749	23.7576	5.97204	1.024	0.306	6.802	14.89
259	344956	4278196	8.657	0.114	0.889	13.244	23.15	15.24	61.61	1.73	90	2	5.49	12.1	0.077	8.113	1.75068	25.466	3.9945	2.54955	33.7607	5.18555	0.965	0.313	7.914	22.571
260	349258	4278034	8.42	0.111	1.204	19.315	24.039	26.526	49.435	1.659	90	2	0.535519	8.77	0.088	6.057	2.77421	29.8823	2.25736	1.52411	36.438	7.6135	1.115	0.352	9.703	20.475
